# Supplementary material for: Li+-conductive Li2SiO3 stabilized Li-rich layered oxide with an in situ formed spinel nano-coating layer: toward enhanced electrochemical performance for lithium-ion batteries
Source: Royal Society of Chemistry journal article supplement (doi:10.1039/c6ra00769d), 2016-01-01
Supplement: c6ra00769d1.pdf [file c6ra00769d1.pdf]

## Electronic supplementary information

**Li<sup>+</sup>-conductive Li<sub>2</sub>SiO<sub>3</sub> stabilized Li-rich layered oxide with *in-situ* formed spinel nano-coating layer: toward enhanced electrochemical performance for lithium-ion batteries**

**Mingquan Xu,<sup>a</sup> Qingwang Lian,<sup>a</sup> Yuxin Wu,<sup>a</sup> Cheng Ma,<sup>a</sup> Pengfei Tan,<sup>a</sup> Qingbing Xia,<sup>a</sup> Jinfang Zhang,<sup>a</sup> Douglas G. Ivey<sup>b</sup> and Weifeng Wei<sup>\*a</sup>**

<sup>a</sup> State key Laboratory of Powder Metallurgy, Central South University, Changsha, 410083, P. R. China. E-mail: weifengwei@csu.edu.cn; Fax: +86 73188877876; Tel: +86 83188877876

<sup>b</sup> Department of Chemical and Materials Engineering, University of Alberta, Edmonton, AB T6G 2V4, Canada

Fig. S1 Powder XRD patterns of the pristine and LS-6% samples ( $\text{Li}_2\text{SiO}_3$  indicated by black asterisk).

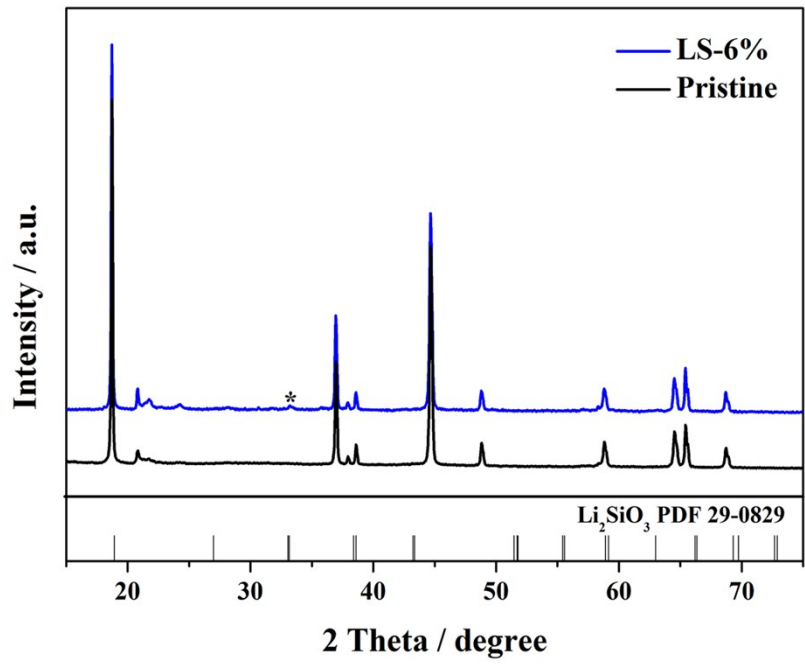

Fig. S2 EIS plot of the pristine, LS, and LS@S sample after activated at 0.1 C for 3 cycles (dots denote the experimental data, lines denote the simulation results).

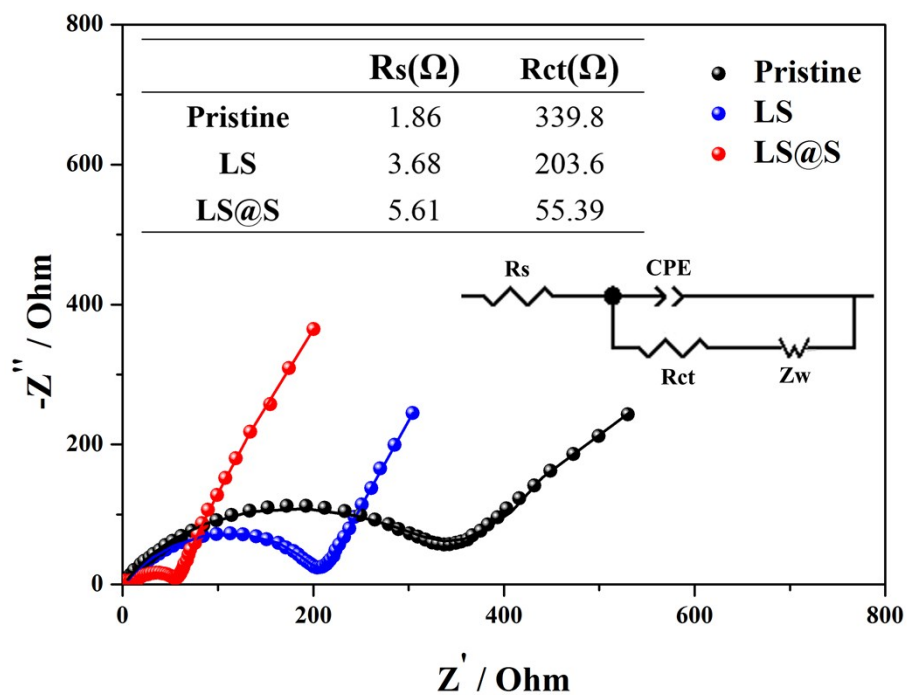

Note: Before the EIS test, all cells rested for 30 min after the end of the 3rd discharge process and the OCP was relaxed to approximately 2.8 V.

Fig. S3 CV curve for the LS@S sample for the initial three cycles.

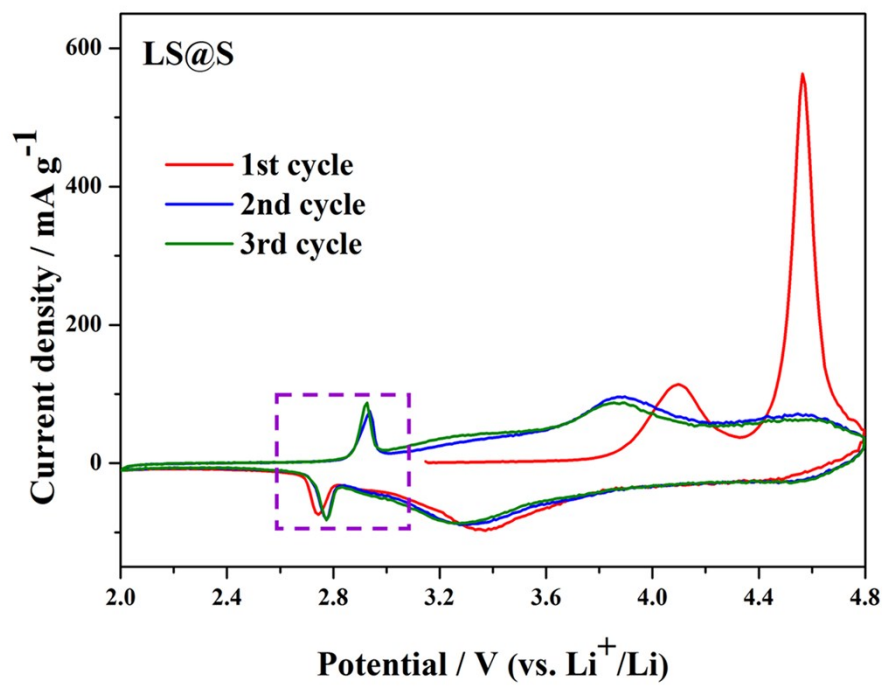

**Table S1 comparing electrochemical charge-discharge profiles of Li-rich layered oxides and other cathode materials**

| materials                                           | voltage range / V | redox couple                                                                                                       | redox potential / V                |
|-----------------------------------------------------|-------------------|--------------------------------------------------------------------------------------------------------------------|------------------------------------|
| Li-rich layered oxides (our work)                   | 2-4.8             | Ni <sup>2+</sup> /Ni <sup>4+</sup> ,<br>Co <sup>3+</sup> /Co <sup>4+</sup> ,<br>Mn <sup>3+</sup> /Mn <sup>4+</sup> | 2.94/2.77, 3.87/3.32,<br>4.55/4.51 |
| LiCoO <sub>2</sub> <sup>1</sup>                     | 2.5-4.3           | Co <sup>3+</sup> /Co <sup>4+</sup>                                                                                 | 4.0/3.84                           |
| Li(MMn <sub>11/6</sub> )O <sub>4</sub> <sup>2</sup> | 3.5-4.3           | Mn <sup>3+</sup> /Mn <sup>4+</sup>                                                                                 | 4.06/3.94, 4.18/4.07               |
| LiVPO <sub>4</sub> F <sup>3</sup>                   | 3.0-4.5           | V <sup>3+</sup> /V <sup>4+</sup>                                                                                   | 4.45/4.13                          |
| MOPOFs <sup>4</sup>                                 | 2.5-4.6           | V <sup>4+</sup> /V <sup>5+</sup>                                                                                   | 4.18/3.83                          |
| $\alpha_1$ -LiVOPO <sub>4</sub> <sup>5</sup>        | 2.5-4.5           | V <sup>4+</sup> /V <sup>5+</sup>                                                                                   | 4.17/3.75                          |

## References

1. K. S. Tan, M. V. Reddy, G. V. S. Rao and B. V. R. Chowdari, *J. Power Sources*, 2005, **147**, 241-248.
2. M. V. Reddy, A. Sakunthala, S. SelvashekaraPandian and B. V. R. Chowdari, *J. Phys. Chem. C*, 2013, **117**, 9056-9064.
3. M. V. Reddy, G. V. Subba Rao and B. V. R. Chowdari, *J. Power Sources*, 2010, **195**, 5768-5774.
4. M. Nagarathinam, K. Saravanan, E. J. H. Phua, M. V. Reddy, B. V. R. Chowdari and J. J. Vittal, *Angew. Chem., Int. Ed.*, 2012, **51**, 5866-5870.
5. A. Shahul Hameed, M. Nagarathinam, M. V. Reddy, B. V. R. Chowdari and J. J. Vittal, *J. Mater. Chem.*, 2012, **22**, 7206-7213.
